# Supplementary material
Source: Springer Nature journal article supplement (https://www.springermedizin.de/resource/supplementary/13046_2011_456_MOESM3_ESM.pdf/9662272)

**A**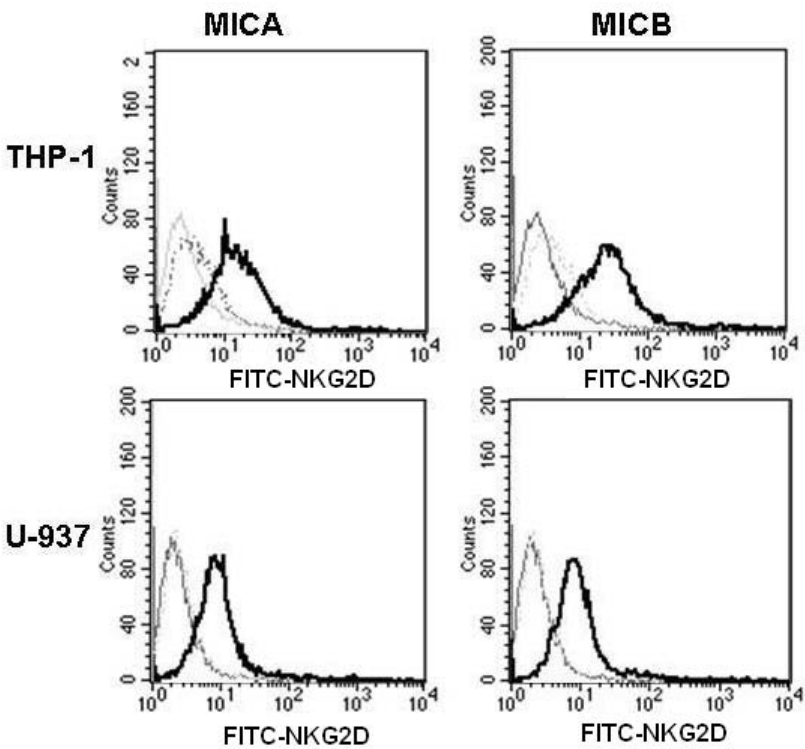**B**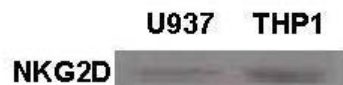**C**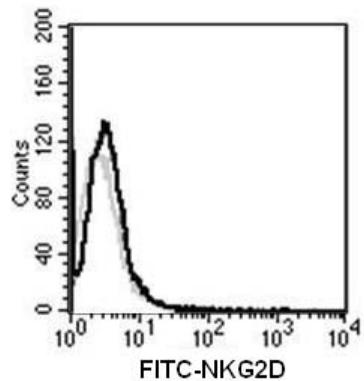

Supplement: MOESM3 [file 9662272]
